# Supplementary material
Source: Springer Nature journal article supplement (https://www.springermedizin.de/resource/supplementary/12985_2009_574_MOESM1_ESM.pdf/9608482)

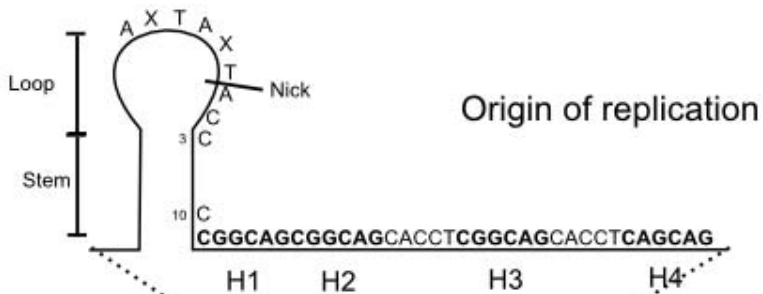

ORF2 encodes  
Cap protein

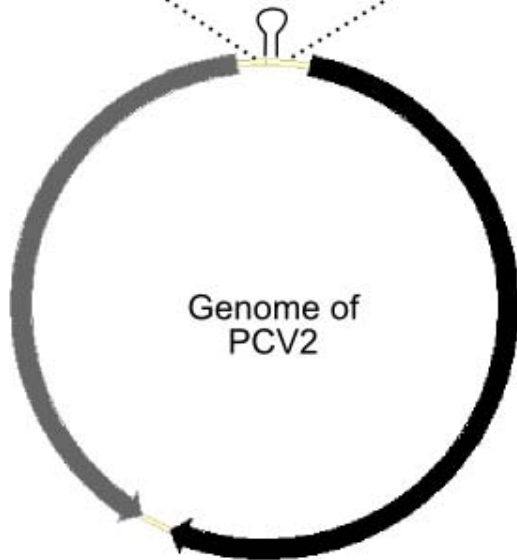

ORF1  
encodes Rep and Rep' proteins

Supplement: MOESM1 [file 9608482]
